# Supplementary material
Source: PubMed Central journal article supplement (PMC4505239)
Supplement: AAC.00510-15_zac008154187so1.pdf [file AAC.00510-15_zac008154187so1.pdf]

1 Supplemental figures

2 Figure S1

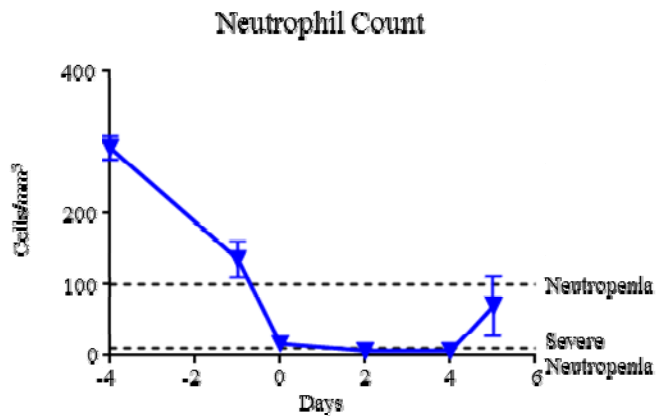

3

4 **Figure S1: Neutrophil count following CYP injection.** Enumeration of neutrophils in the  
5 blood of C57BL6/J mice following CYP injection on days -4 and -1 (N=5). Data are  
6 representative of 3 independent experiments.

7 Figure S2

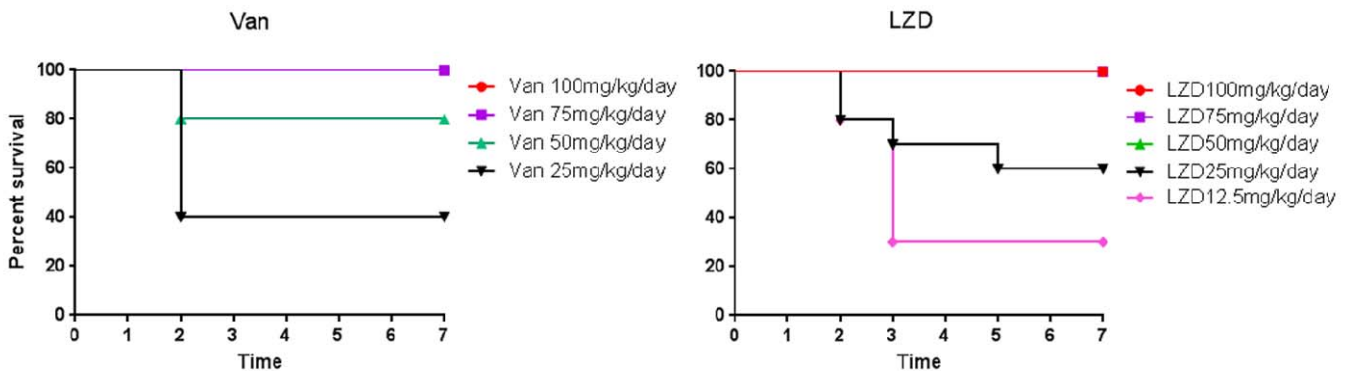

8

9 **Figure S2: Determine sub-therapeutic dose of vancomycin and linezolid.** Survival of CYP  
10 treated C57BL/6J mice (N=10) challenged with SF8300 ( $1.8 \times 10^7$  CFU) and treated starting 1 h  
11 post-infection with A) vancomycin BID for 3 days or B) linezolid BID for 2 days. Data are  
12 representative of 3 independent experiments. VAN = vancomycin; LZD = linezolid.

13

1 **Figure S3**

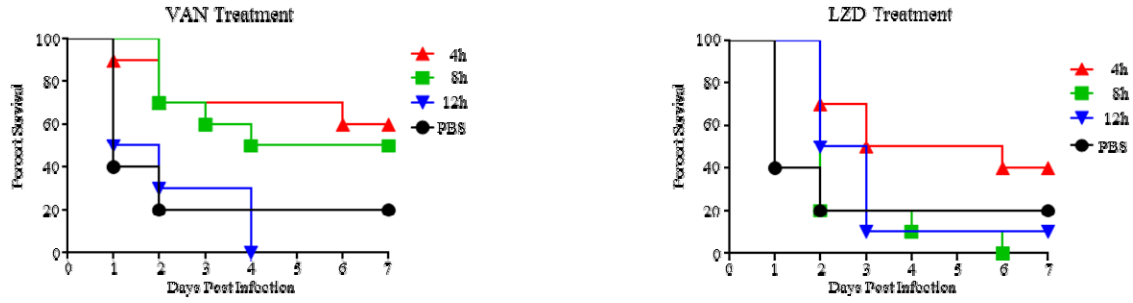

2

3 **Figure S3: Determine the extended time of treatment.** Survival of CYP treated C57BL/6J

4 mice (n=10) challenged with SF8300 ( $1.8 \times 10^7$  CFU) and treated with A) vancomycin

5 (75mg/kg/day for 3 days) or B) linezolid (50mg/kg/day for 2 days) starting at increasing times

6 following infection. Data are representative of 3 independent experiments. VAN = vancomycin;

7 LZD = linezolid.

8

9

10
